# Supplementary material for: A solution-processed zero-dimensional all-inorganic perovskite scintillator for high resolution gamma-ray spectroscopy detection
Source: Royal Society of Chemistry journal article supplement (doi:10.1039/d0nr00772b), 2020-01-01
Supplement: d0nr00772b1.pdf [file d0nr00772b1.pdf]

# **Solution-processed zero-dimensional all-inorganic perovskite scintillator for high resolution gamma-ray spectroscopy detection**

Qiang Xu, <sup>\*a</sup> Juan Wang,<sup>a</sup> Wenyi Shao,<sup>a</sup> Xiao Ouyang,<sup>bc</sup> Xiang Wang,<sup>a</sup>  
Xinlei Zhang,<sup>a</sup> Yong Guo,<sup>a</sup> and Xiaoping Ouyang<sup>\*abc</sup>

<sup>a</sup> *Department of Nuclear Science and Technology, Nanjing University of Aeronautics and Astronautics, Nanjing 211106, China.*

<sup>b</sup> *Shaanxi Engineering Research Center of Controllable Neutron Source, School of Science, Xijing University, Xi'an, 710123, China.*

<sup>c</sup> *Institute of Nuclear and New Energy Technology, Tsinghua University, Beijing, 100084. Beijing, China.*

<sup>d</sup> *Northwest Institute of Nuclear Technology, Xi'an, 710024, China.*

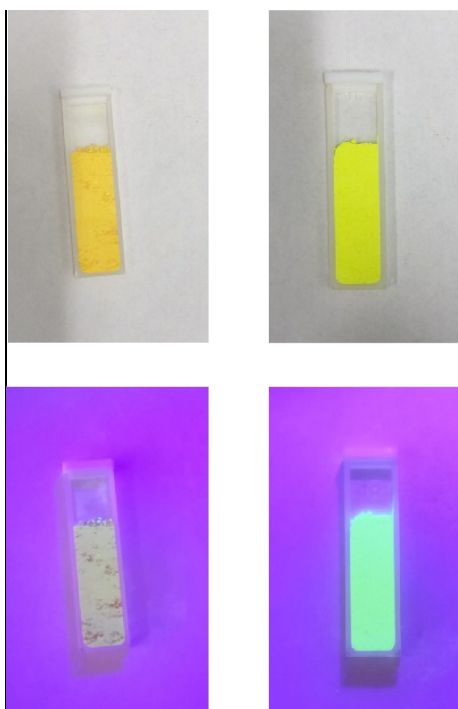

**Figure S1.** Optical images of  $\text{CsPbBr}_3+\text{Cs}_4\text{PbBr}_6$  and  $\text{CsPbBr}_3/\text{Cs}_4\text{PbBr}_6$  materials under sunlight and 405nm laser.

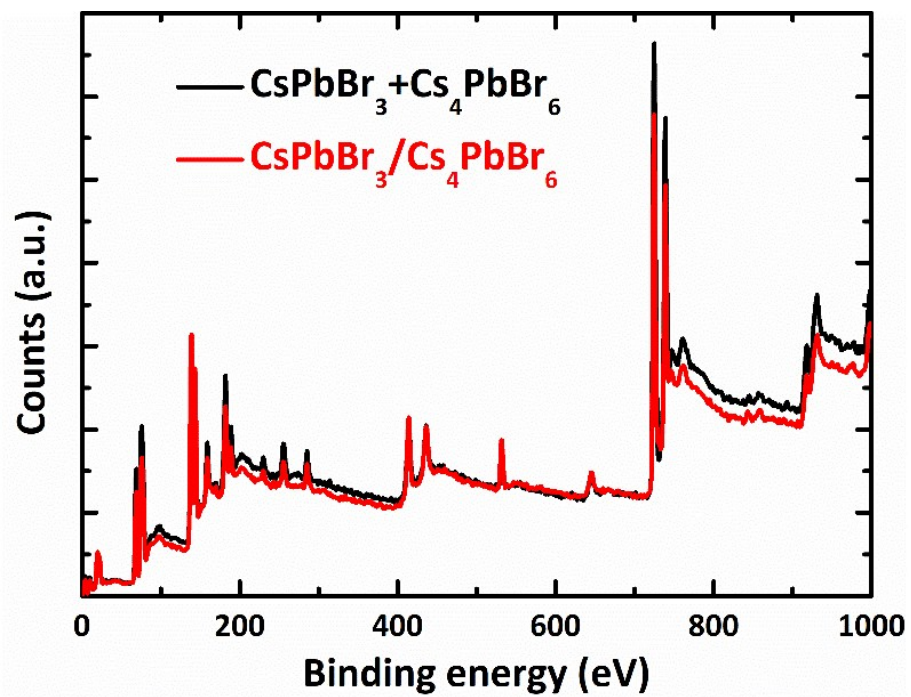

Figure S2 Full XPS spectra of CsPbBr<sub>3</sub>+Cs<sub>4</sub>PbBr<sub>6</sub> and CsPbBr<sub>3</sub>/Cs<sub>4</sub>PbBr<sub>6</sub>

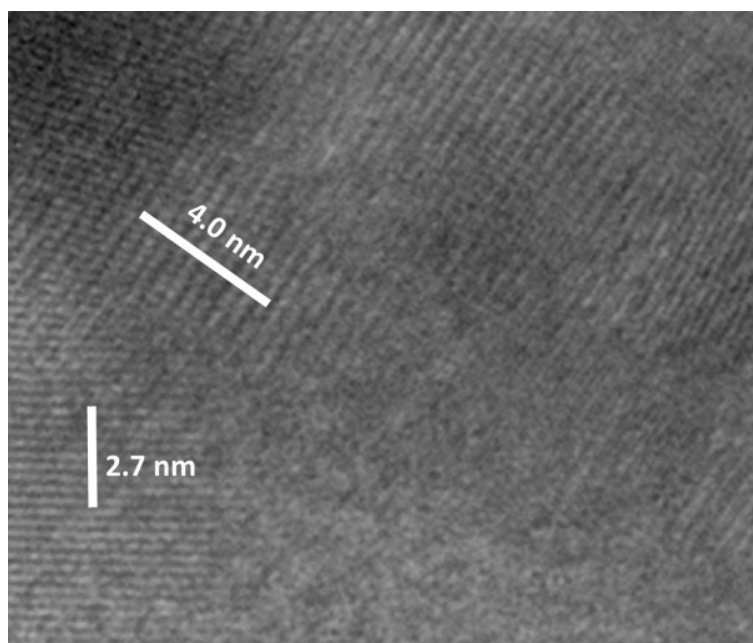

Figure S3 HRTEM image of CsPbBr<sub>3</sub>/Cs<sub>4</sub>PbBr<sub>6</sub>.

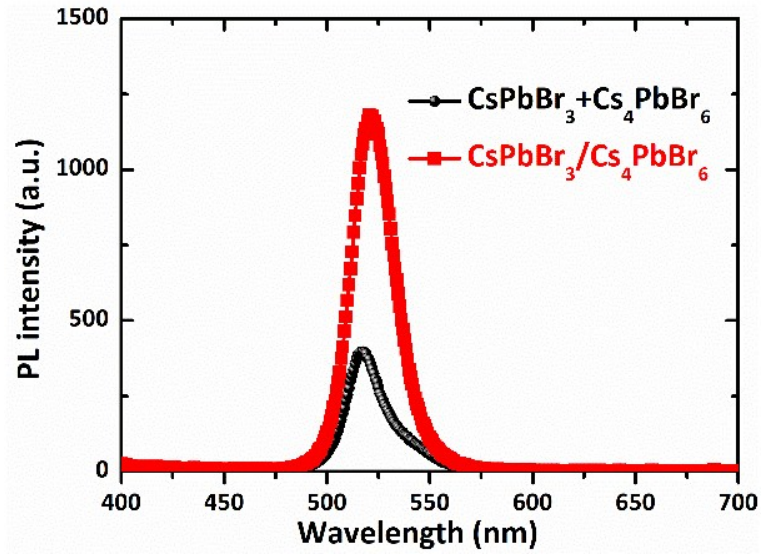

Figure S4 Photoluminescence spectra of  $\text{CsPbBr}_3 + \text{Cs}_4\text{PbBr}_6$  and  $\text{CsPbBr}_3 / \text{Cs}_4\text{PbBr}_6$

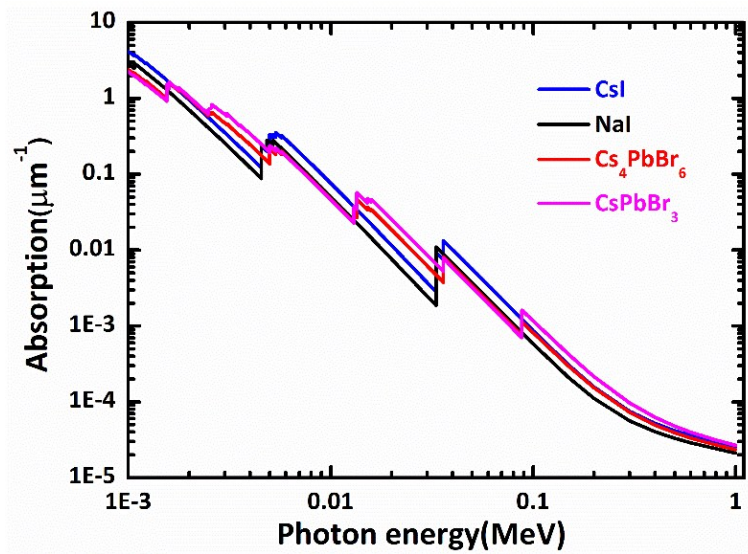

Figure S5 The attenuation coefficient of  $\text{Cs}_4\text{PbBr}_6$ ,  $\text{CsPbBr}_3$ , NaI, and CsI as a function of energy.

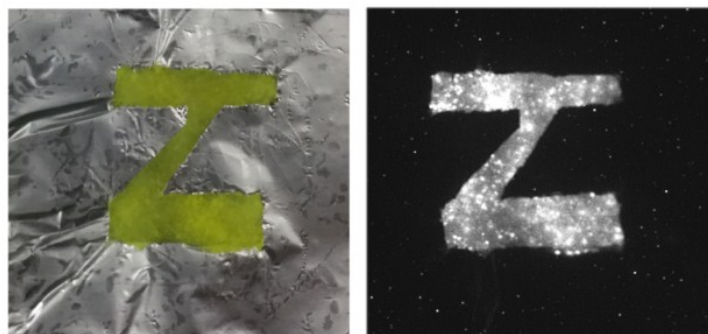

**Figure S6** Optical and X-ray image of  $\text{CsPbBr}_3/\text{Cs}_4\text{PbBr}_6$  powder that record by CCD camera. X-ray image excited with 40keV X-ray.

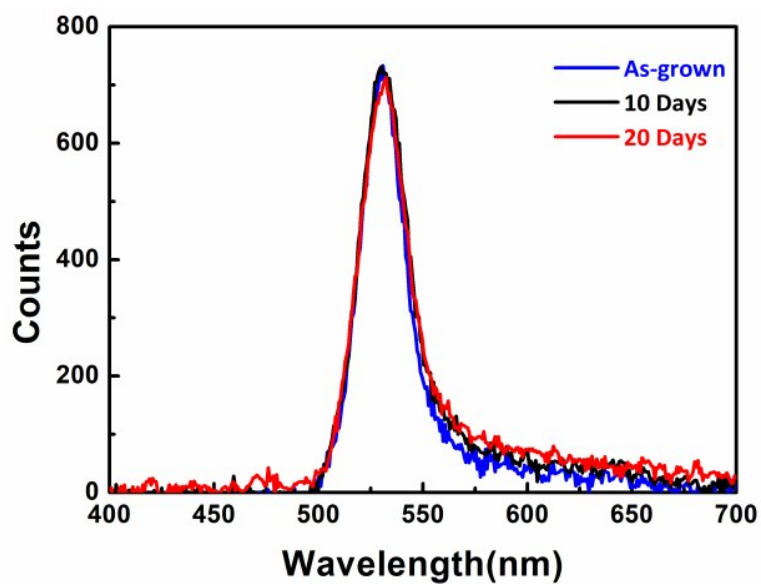

**Figure S7** RL spectra of  $\text{CsPbBr}_3/\text{Cs}_4\text{PbBr}_6$  material stored in air at room temperature for twenty days.

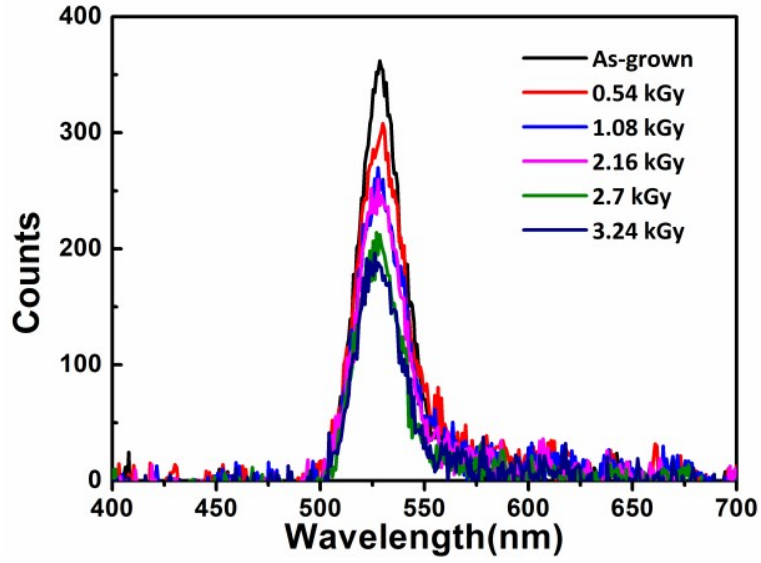

**Figure S8** RL spectra of CsPbBr<sub>3</sub>/Cs<sub>4</sub>PbBr<sub>6</sub> material irradiated with different dosage gamma-ray

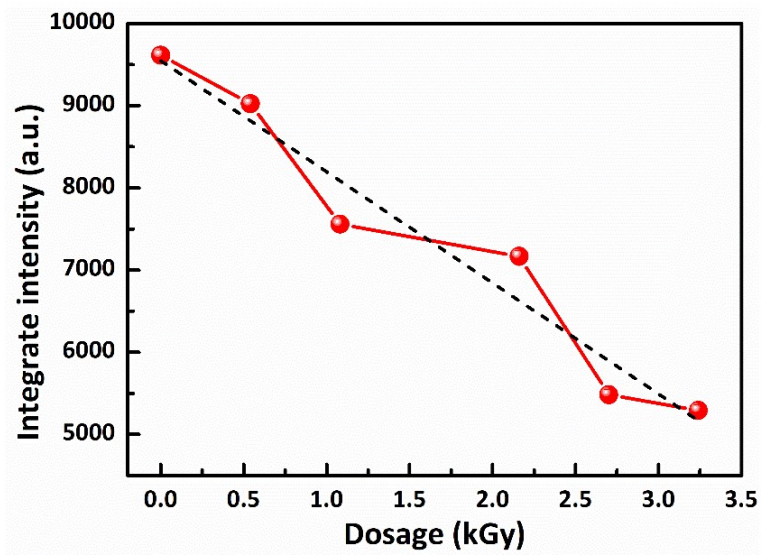

**Figure S9** Radiation stability test for CsPbBr<sub>3</sub>/Cs<sub>4</sub>PbBr<sub>6</sub> scintillator under various dosage of Co-60 gamma-ray.

**TABLE****Table S1** Summarized scintillation parameters of commercial products (from Saint-Gobain Crystal)

| Materials                                                  | Emission wavelength (nm) | Decay time (ns)         | Light yield (Photons/MeV) | Hygroscopic | Ref       |
|------------------------------------------------------------|--------------------------|-------------------------|---------------------------|-------------|-----------|
| NaI(Tl)                                                    | 415                      | 250                     | 38000                     | Yes         | a         |
| LaBr <sub>3</sub> (Ce)                                     | 380                      | 16                      | 63000                     | Yes         | a         |
| CsI(Na)                                                    | 420                      | 630                     | 41000                     | Yes         | a         |
| BGO                                                        | 480                      | 300                     | 8000-10000                | No          | a         |
| BaF <sub>2</sub>                                           | 220                      | 0.6-0.8                 | 1800                      | Slightly    | a         |
| CsPbBr <sub>3</sub> /<br>Cs <sub>4</sub> PbBr <sub>6</sub> | 525                      | 1.3 (fast)<br>6.7(slow) | 64000                     | No          | This work |

<sup>a)</sup> the data from the datasheet of Saint-Gobain Crystal inc.
